# Supplementary material for: Understanding on-site sanitation in rural Fiji: where definitions of sanitation back-ends differ
Source: Royal Society of Chemistry journal article supplement (doi:10.1039/d2ew00685e), 2023-01-01
Supplement: d2ew00685e1.pdf [file d2ew00685e1.pdf]

# Understanding on-site sanitation in rural Fiji: where definitions of sanitation back-ends differ

## Supplementary Information

**Table S1:** Steps performed during community-wide sanitation safety planning (SSP) <sup>1</sup>.

| Step                                                       | Description                                                                                                                                                                                                                                                                                                                                                                                                                                                                                 |
|------------------------------------------------------------|---------------------------------------------------------------------------------------------------------------------------------------------------------------------------------------------------------------------------------------------------------------------------------------------------------------------------------------------------------------------------------------------------------------------------------------------------------------------------------------------|
| Step 1: Preparation for SSP                                | <ul style="list-style-type: none"><li>• Assemble team<ul style="list-style-type: none"><li>○ Community leader</li><li>○ Community health worker / health committee</li><li>○ Water safety committee members</li><li>○ Key residents.</li></ul></li></ul>                                                                                                                                                                                                                                    |
| Step 2: Describe sanitation systems                        | <ul style="list-style-type: none"><li>• After being guided by WISH Fiji team, community-wide on-site sanitation data were gathered from community official records about the types of back-ends. The following information were collected during the SSP:<ul style="list-style-type: none"><li>○ Types and number of sanitations back-ends (septic system, tank, and pit latrine)</li><li>○ Number of shared latrines</li><li>○ What happens when back-ends become full</li></ul></li></ul> |
| Step 3: Identify and assess hazards                        | <ul style="list-style-type: none"><li>• Community education regarding back-end type safety.</li></ul>                                                                                                                                                                                                                                                                                                                                                                                       |
| Step 4: Develop and implement incremental improvement plan | <ul style="list-style-type: none"><li>• Develop action plans by identifying opportunities to replace or repair unsafe sanitation systems.</li></ul>                                                                                                                                                                                                                                                                                                                                         |
| Step 5: Monitor control measures and verify performance    | <ul style="list-style-type: none"><li>• Monitoring of sanitation systems by community to ensure safe sanitation.</li></ul>                                                                                                                                                                                                                                                                                                                                                                  |
| Step 6: Develop supporting programmes and review plans     | <ul style="list-style-type: none"><li>• Cyclic review to be conducted every 12 months.</li></ul>                                                                                                                                                                                                                                                                                                                                                                                            |

**Table S2:** Treatment assessment criteria for sanitation back-end.

| Back-end type                                                        | Treating / Not treating |
|----------------------------------------------------------------------|-------------------------|
| Category 1- Septic system                                            | Treating                |
| Category 2 – Tank (perforated and bottom open plastic or metal tank) | Not treating            |
| Category 3 –Not visible tank                                         | Not treating            |
| Category 4 – Pit latrine                                             | Not treating            |
| Not photographed*                                                    | Treating / Not treating |

\* Both treating and not treating are listed as the back-end category is unknown.

**Table S3:** Community level back-end categorisation by household according to results from the sanitation survey, observation, and sanitation safety planning (SSP).

| Catchment | Community†   | Sanitation survey and observation<br>29 communities<br>311 households |                     |                       |                    |                            |               |                         |                    |                  | Community-wide sanitation safety planning<br>29 communities<br>1502 households |                  |                   |                                      |                      |                   |                    |
|-----------|--------------|-----------------------------------------------------------------------|---------------------|-----------------------|--------------------|----------------------------|---------------|-------------------------|--------------------|------------------|--------------------------------------------------------------------------------|------------------|-------------------|--------------------------------------|----------------------|-------------------|--------------------|
|           |              | Surveyed households                                                   | Surveyed population | Sanitation survey (‡) |                    | Sanitation observation (*) |               |                         |                    |                  | Reported septic system in survey compared to observation§                      | Total households | Total population* | Sanitation Safety Planning (SSP) (*) |                      |                   |                    |
|           |              |                                                                       |                     | Cat 1: Septic system  | Cat 4: Pit latrine | Cat 1: Septic system       | Cat 2: Tank   | Cat 3: Not visible tank | Cat 4: Pit latrine | Not photographed |                                                                                |                  |                   | Sewer system                         | Cat 1: Septic system | Cat 2 and 3: Tank | Cat 4: Pit latrine |
| Bureta    | Community E1 | 8                                                                     | 36                  | 8                     |                    |                            |               | 5 (63%)                 |                    | 3 (38%)          | 5 - 8 ↑                                                                        | 49               | 256               |                                      | 5 (10%)              | 44 (90%)          |                    |
|           | Community E2 | 10                                                                    | 46                  | 9 (90%)               | 1 (10%)            |                            | 1 (10%)       | 7 (70%)                 |                    | 2 (20%)          | 7 - 9 ↑                                                                        | 43               | 230               |                                      |                      | 23 (53%)          | 18 (42%)           |
|           | Community E3 | 7                                                                     | 40                  | 7                     |                    |                            | 1 (14%)       | 5 (71%)                 |                    | 1 (14%)          | 6 - 7 ↑                                                                        | 47               | 101               |                                      | 2 (4%)               | 28 (60%)          | 13 (28%)           |
|           | Community E4 | 6                                                                     | 21                  | 5 (83%)               | 1 (17%)            | 3 (50%)                    |               | 3 (50%)                 |                    |                  | 2 ↑                                                                            | 24               | 101               |                                      |                      | 24                |                    |
|           | Community E5 | 11                                                                    | 42                  | 11                    |                    | 2 (18%)                    | 1 (9%)        | 6 (55%)                 |                    | 2 (18%)          | 7 - 9 ↑                                                                        | 78               | 273               |                                      | 7 (9%)               | 57 (73%)          |                    |
|           | Community E6 | 6                                                                     | 26                  | 4 (67%)               | 2 (33%)            |                            |               | 5 (83%)                 | 1 (17%)            |                  | 4 ↑                                                                            | 16               | 53                |                                      | 2 (13%)              | 6 (38%)           | 4 (25%)            |
|           | Community E7 | 7                                                                     | 44                  | 6 (86%)               | 1 (14%)            | 1 (14%)                    |               | 3 (43%)                 |                    | 3 (43%)          | 2 - 5 ↑                                                                        | 41               | 154               |                                      | 1 (2%)               | 38 (93%)          | 2 (5%)             |
|           |              | <b>55</b>                                                             | <b>255</b>          | <b>50 (91%)</b>       | <b>5 (9%)</b>      | <b>6 (11%)</b>             | <b>3 (5%)</b> | <b>34 (62%)</b>         | <b>1 (2%)</b>      | <b>11 (20%)</b>  | <b>33 - 44 ↑ (60% - 80%)</b>                                                   | <b>298</b>       | <b>1168</b>       |                                      | <b>17 (6%)</b>       | <b>220 (74%)</b>  | <b>37 (12%)</b>    |
| Dama      | Community D1 | 6                                                                     | 22                  | 3 (50%)               | 3 (50%)            |                            |               | 3 (50%)                 | 3 (50%)            |                  | 3 ↑                                                                            | 29               | 133               |                                      | 8 (28%)              | 15 (52%)          |                    |

† Communities are coded for anonymity purpose.

‡ Percentage of households.

§ The lower range is calculated assuming from the missing observation data that all not photographed back-ends are Cat 1 (septic system). The higher range is based on assuming all not photographed back-ends are category 2 (tank), category 3 (visible tank) or category 4 (pit latrine).

|             |              |           |            |                     |                     |                     |                   |                     |                     |                     |                                  |            |             |  |                      |                      |                     |
|-------------|--------------|-----------|------------|---------------------|---------------------|---------------------|-------------------|---------------------|---------------------|---------------------|----------------------------------|------------|-------------|--|----------------------|----------------------|---------------------|
|             | Community D2 | 10        | 75         | 10                  |                     | 4<br>(40%)          | 1<br>(10%)        | 5<br>(50%)          |                     |                     | 6 ↑                              | 29         | 146         |  | 11<br>(38%)          | 7<br>(24%)           | 1<br>(3%)           |
|             | Community D3 | 10        | 48         | 6<br>(60%)          | 4<br>(40%)          | 4<br>(40%)          |                   | 2<br>(20%)          | 4<br>(40%)          |                     | 2 ↑                              | 79         | 317         |  | 40<br>(51%)          | 27<br>(34%)          |                     |
|             | Community D4 | 23        | 142        | 15<br>(65%)         | 8<br>(35%)          | 8<br>(35%)          | 1<br>(4%)         | 5<br>(22%)          | 8<br>(35%)          | 1<br>(4%)           | 6 - 7 ↑                          | 145        | 675         |  | 37<br>(26%)          | 50<br>(34%)          | 58<br>(40%)         |
|             | Community D5 | 6         | 33         | 5<br>(83%)          | 1<br>(17%)          |                     | 1<br>(17%)        | 4<br>(66%)          | 1<br>(17%)          |                     | 5 ↑                              | 27         | 120         |  | 5<br>(19%)           | 10<br>(37%)          | 12<br>(44%)         |
|             | Community D6 | 10        | 66         |                     | 10                  |                     |                   |                     | 10                  |                     |                                  | 36         | 198         |  | 2<br>(6%)            | 25<br>(69%)          | 1<br>(3%)           |
|             |              | <b>65</b> | <b>386</b> | <b>39<br/>(60%)</b> | <b>26<br/>(40%)</b> | <b>16<br/>(25%)</b> | <b>3<br/>(5%)</b> | <b>19<br/>(29%)</b> | <b>26<br/>(40%)</b> | <b>1<br/>(2%)</b>   | <b>22 - 23 ↑<br/>(34% - 35%)</b> | <b>345</b> | <b>1589</b> |  | <b>103<br/>(30%)</b> | <b>134<br/>(39%)</b> | <b>72<br/>(21%)</b> |
| Dawasamu    | Community A1 | 16        | 128        | 14<br>(88%)         | 2<br>(13%)          |                     | 1<br>(6%)         | 12<br>(75%)         | 2<br>(13%)          | 1<br>(6%)           | 13 - 14 ↑                        | 75         | 349         |  | 5<br>(7%)            | 66<br>(88%)          | 4<br>(5%)           |
|             | Community A2 | 10        | 34         | 10                  |                     | 3<br>(30%)          |                   | 2<br>(20%)          |                     | 5<br>(50%)          | 2 - 7 ↑                          | 30         | 171         |  |                      | 30                   |                     |
|             | Community A3 | 10        | 47         | 2<br>(20%)          | 8<br>(80%)          |                     | 1<br>(10%)        |                     | 8<br>(80%)          | 1<br>(10%)          | 1 - 2 ↑                          | 30         | 125         |  | 2<br>(7%)            | 11<br>(37%)          |                     |
|             | Community A4 | 10        | 85         | 9<br>(90%)          | 1<br>(10%)          | 3<br>(30%)          |                   | 4<br>(40%)          | 1<br>(10%)          | 2<br>(20%)          | 4 - 6 ↑                          | 35         | 132         |  | 13<br>(37%)          | 3<br>(9%)            | 6<br>(17%)          |
|             | Community A5 | 10        | 64         | 8<br>(80%)          | 2<br>(20%)          | 1<br>(10%)          | 2<br>(20%)        | 5<br>(50%)          | 1<br>(10%)          | 1<br>(10%)          | 6 - 7 ↑                          | 27         | 155         |  | 21<br>(78%)          | 2<br>(7%)            | 3<br>(11%)          |
|             |              | <b>56</b> | <b>358</b> | <b>43<br/>(77%)</b> | <b>13<br/>(23%)</b> | <b>7<br/>(13%)</b>  | <b>4<br/>(7%)</b> | <b>23<br/>(41%)</b> | <b>12<br/>(21%)</b> | <b>10<br/>(18%)</b> | <b>26 - 36 ↑<br/>(46% - 64%)</b> | <b>197</b> | <b>932</b>  |  | <b>41<br/>(21%)</b>  | <b>112<br/>(57%)</b> | <b>24<br/>(12%)</b> |
| Upper Navua | Community C1 | 11        | 40         | 11                  |                     |                     | 2<br>(18%)        | 8<br>(73%)          |                     | 1<br>(9%)           | 10 - 11 ↑                        | 57         | 243         |  |                      | 51<br>(89%)          | 6<br>(11%)          |
|             | Community C2 | 10        | 46         | 7<br>(70%)          | 3<br>(30%)          | 1<br>(10%)          | 1<br>(10%)        | 8<br>(80%)          |                     |                     | 6 ↑                              | 55         | 240         |  | 33<br>(60%)          | 22<br>(40%)          |                     |
|             | Community C3 | 14        | 65         | 9<br>(64%)          | 5<br>(36%)          | 1<br>(7%)           |                   | 9<br>(64%)          | 1<br>(7%)           | 3<br>(21%)          | 5 - 8 ↑                          |            |             |  |                      |                      |                     |
|             | Community C4 | 13        | 63         | 10<br>(77%)         | 3<br>(23%)          | 3<br>(23%)          |                   | 10<br>(77%)         |                     |                     | 7 ↑                              | 70         | 337         |  | 4<br>(6%)            | 4<br>(6%)            | 63<br>(90%)         |

\*\* Community population recorded in year 2020.

|               |              |            |             |                     |                    |                    |                   |                     |                    |                    |                                   |                                 |             |                   |                     |                     |                     |
|---------------|--------------|------------|-------------|---------------------|--------------------|--------------------|-------------------|---------------------|--------------------|--------------------|-----------------------------------|---------------------------------|-------------|-------------------|---------------------|---------------------|---------------------|
|               | Community C5 | 17         | 83          | 13<br>(76%)         | 4<br>(24%)         | 1<br>(6%)          |                   | 14<br>(82%)         |                    | 2<br>(12%)         | 10 - 12 ↑                         | 92                              | 326         |                   | 37<br>(40%)         | 55<br>(60%)         |                     |
|               |              | <b>65</b>  | <b>297</b>  | <b>50</b><br>(77%)  | <b>15</b><br>(23%) | <b>6</b><br>(9%)   | <b>3</b><br>(5%)  | <b>49</b><br>(75%)  | <b>1</b><br>(2%)   | <b>6</b><br>(9%)   | <b>38 - 44</b> ↑<br>(58% - 68%)   | <b>274</b>                      | <b>1146</b> |                   | <b>74</b><br>(27%)  | <b>132</b><br>(48%) | <b>69</b><br>(25%)  |
| Waibula       | Community B1 | 10         | 45          | 9<br>(90%)          | 1<br>(10%)         | 3<br>(30%)         |                   | 2<br>(20%)          |                    | 5<br>(50%)         | 1 - 6 ↑                           | 102                             | 326         |                   | 10<br>(10%)         | 92<br>(90%)         |                     |
|               | Community B3 | 10         | 44          | 6<br>(60%)          | 4<br>(40%)         |                    | 1<br>(10%)        | 5<br>(50%)          | 4<br>(40%)         |                    | 6 ↑                               | 30                              | 142         |                   | 14<br>(47%)         | 16<br>(53%)         |                     |
|               | Community B2 | 18         | 98          | 17<br>(94%)         | 1<br>(6%)          | 2<br>(11%)         | 4<br>(22%)        | 8<br>(44%)          | 1<br>(6%)          | 3<br>(17%)         | 12 - 15 ↑                         | 97                              | 495         |                   | 31<br>(32%)         | 42<br>(43%)         | 19<br>(20%)         |
|               | Community B4 | 10         | 46          | 10                  |                    | 2<br>(20%)         |                   | 7<br>(70%)          |                    | 1<br>(10%)         | 7 - 8 ↑                           | 62                              | 327         | 18<br>(29%)       | 16<br>(26%)         | 28<br>(45%)         |                     |
|               | Community B5 | 10         | 53          | 7<br>(70%)          | 3<br>(30%)         |                    | 1<br>(10%)        | 6<br>(60%)          | 3<br>(30%)         |                    | 7 ↑                               | 16                              | 78          |                   |                     | 2<br>(13%)          | 14<br>(88%)         |
|               | Community B6 | 12         | 59          | 9<br>(75%)          | 3<br>(25%)         |                    |                   | 8<br>(67%)          | 1<br>(8%)          | 3<br>(25%)         | 6 - 9 ↑                           | 81                              | 308         |                   | 6<br>(7%)           | 22<br>(27%)         | 48<br>(59%)         |
|               |              |            | <b>70</b>   | <b>345</b>          | <b>58</b><br>(83%) | <b>12</b><br>(17%) | <b>7</b><br>(10%) | <b>6</b><br>(9%)    | <b>36</b><br>(51%) | <b>9</b><br>(13%)  | <b>12</b><br>(17%)                | <b>40 - 52</b> ↑<br>(57% - 74%) | <b>388</b>  | <b>1676</b>       | <b>18</b><br>(5%)   | <b>77</b><br>(20%)  | <b>202</b><br>(52%) |
| All Catchment |              | <b>311</b> | <b>1641</b> | <b>240</b><br>(77%) | <b>71</b><br>(23%) | <b>42</b><br>(14%) | <b>19</b><br>(6%) | <b>161</b><br>(52%) | <b>49</b><br>(16%) | <b>40</b><br>(13%) | <b>161 - 198</b> ↑<br>(51% - 64%) | <b>1502</b>                     | <b>6511</b> | <b>18</b><br>(1%) | <b>312</b><br>(21%) | <b>800</b><br>(53%) | <b>283</b><br>(19%) |

**Table S4:** Statistical analysis comparing soil *E. coli* concentration of back-end types.

| Catchment | Latrine back-end soil <i>E. coli</i> CFU/g soil |                   |                   |                   |             |      |     |     |                         |                   |     |                   |                    |      |     | Mann Whitney U test comparing cat 1 to other categories <sup>††</sup> |         |
|-----------|-------------------------------------------------|-------------------|-------------------|-------------------|-------------|------|-----|-----|-------------------------|-------------------|-----|-------------------|--------------------|------|-----|-----------------------------------------------------------------------|---------|
|           | Cat 1: Septic system                            |                   |                   |                   | Cat 2: Tank |      |     |     | Cat 3: Not visible tank |                   |     |                   | Cat 4: Pit latrine |      |     |                                                                       | p value |
|           | n                                               | Mean              | Min               | Max               | n           | Mean | Min | Max | n                       | Mean              | Min | Max               | n                  | Mean | Min |                                                                       |         |
| Bureta    | 2                                               | $8.5 \times 10^3$ | $6.8 \times 10^3$ | $1.0 \times 10^4$ |             |      |     |     | 9                       | $1.9 \times 10^4$ | 0   | $8.5 \times 10^4$ | 1                  |      |     |                                                                       | 0.485   |

<sup>††</sup> Tank, not visible tank and pit latrine categories were combined into single category for the statistical test.

|              |   |                   |                   |                   |   |                   |                   |                   |    |                   |                   |                   |    |                   |                   |                   |       |
|--------------|---|-------------------|-------------------|-------------------|---|-------------------|-------------------|-------------------|----|-------------------|-------------------|-------------------|----|-------------------|-------------------|-------------------|-------|
| Dama         | 3 | $7.1 \times 10^3$ | $8.4 \times 10^2$ | $1.6 \times 10^4$ |   |                   |                   |                   | 4  | $9.0 \times 10^3$ | $2.2 \times 10^3$ | $1.7 \times 10^4$ | 11 | $3.8 \times 10^4$ | $2.0 \times 10^2$ | $3.1 \times 10^5$ | 0.813 |
| Dawasamu     | 1 |                   |                   |                   | 2 | $2.9 \times 10^4$ | 0                 | $5.8 \times 10^4$ | 8  | $2.2 \times 10^3$ | $4.0 \times 10^2$ | $6.2 \times 10^3$ | 6  | $2.5 \times 10^2$ | 0                 | $1.0 \times 10^3$ | 0.296 |
| Upper Navua  | 2 | $2.5 \times 10^4$ | $1.3 \times 10^4$ | $3.8 \times 10^4$ |   |                   |                   |                   | 15 | $1.5 \times 10^4$ | 0                 | $4.1 \times 10^4$ |    |                   |                   |                   | 0.263 |
| Waibula      |   |                   |                   |                   | 3 | $1.7 \times 10^4$ | $3.6 \times 10^3$ | $3.3 \times 10^4$ | 13 | $2.7 \times 10^3$ | 0                 | $1.3 \times 10^4$ |    |                   |                   |                   |       |
| 5 Catchments | 8 | $1.1 \times 10^4$ | 0                 | $3.8 \times 10^4$ | 5 | $2.2 \times 10^4$ | 0                 | $5.8 \times 10^4$ | 49 | $9.7 \times 10^3$ | 0                 | $8.5 \times 10^4$ | 23 | $1.8 \times 10^4$ | $3.1 \times 10^5$ |                   | 0.216 |

**Table S5:** Criteria for estimating sanitation coverage according to Sustainable Development Goal <sup>2</sup>.

| SDG sanitation service level |                                                                                                       | Front-end slab                      |                          | Front-end category                  |                          | Back-end treatment                  |                                     | Back-end emptying                   |                          | No emptying                         | Sharing status                      |                          |
|------------------------------|-------------------------------------------------------------------------------------------------------|-------------------------------------|--------------------------|-------------------------------------|--------------------------|-------------------------------------|-------------------------------------|-------------------------------------|--------------------------|-------------------------------------|-------------------------------------|--------------------------|
|                              |                                                                                                       | Yes                                 | No                       | Improved                            | Unimproved               | Treating                            | Not treating                        | Safe                                | Unsafe                   |                                     | Private                             | Shared                   |
| <b>Safely managed</b>        | Flush (cistern or pour) to septic with safe or no emptying and not shared (private)                   | <input checked="" type="checkbox"/> | <input type="checkbox"/> | <input checked="" type="checkbox"/> | <input type="checkbox"/> | <input checked="" type="checkbox"/> | <input type="checkbox"/>            | <input checked="" type="checkbox"/> | <input type="checkbox"/> | <input checked="" type="checkbox"/> | <input checked="" type="checkbox"/> | <input type="checkbox"/> |
|                              | Flush (cistern or pour) to tank, not visible tank and pit with safe emptying and not shared (private) | <input checked="" type="checkbox"/> | <input type="checkbox"/> | <input checked="" type="checkbox"/> | <input type="checkbox"/> | <input type="checkbox"/>            | <input checked="" type="checkbox"/> | <input checked="" type="checkbox"/> | <input type="checkbox"/> | <input type="checkbox"/>            | <input checked="" type="checkbox"/> | <input type="checkbox"/> |
|                              | Hole type (dry pit) with slab with safe emptying and not shared (private)                             | <input checked="" type="checkbox"/> | <input type="checkbox"/> | <input checked="" type="checkbox"/> | <input type="checkbox"/> | <input type="checkbox"/>            | <input checked="" type="checkbox"/> | <input checked="" type="checkbox"/> | <input type="checkbox"/> | <input type="checkbox"/>            | <input checked="" type="checkbox"/> | <input type="checkbox"/> |

|                                                                                                                                                              |                                     |                                     |                                     |                                     |                                     |                                     |                          |                                     |                                     |                                     |                                     |
|--------------------------------------------------------------------------------------------------------------------------------------------------------------|-------------------------------------|-------------------------------------|-------------------------------------|-------------------------------------|-------------------------------------|-------------------------------------|--------------------------|-------------------------------------|-------------------------------------|-------------------------------------|-------------------------------------|
| <b>Basic</b><br>Flush (cistern or pour) to tank, not visible tank or pit, hole (dry pit) type with slab and not shared (private) with other households       | <input type="checkbox"/>            | <input type="checkbox"/>            | <input checked="" type="checkbox"/> | <input type="checkbox"/>            | <input type="checkbox"/>            | <input checked="" type="checkbox"/> | <input type="checkbox"/> | <input checked="" type="checkbox"/> | <input checked="" type="checkbox"/> | <input checked="" type="checkbox"/> | <input type="checkbox"/>            |
| <b>Limited</b><br>Flush (cistern or pour) to septic, tank, not visible tank, pit, or hole (dry pit) type with slab and shared between two or more households | <input checked="" type="checkbox"/> | <input type="checkbox"/>            | <input checked="" type="checkbox"/> | <input type="checkbox"/>            | <input checked="" type="checkbox"/> | <input checked="" type="checkbox"/> | <input type="checkbox"/> | <input checked="" type="checkbox"/> | <input checked="" type="checkbox"/> | <input type="checkbox"/>            | <input checked="" type="checkbox"/> |
| <b>Unimproved</b><br>Hole (dry pit) without slab and shared or not shared (private)                                                                          | <input type="checkbox"/>            | <input checked="" type="checkbox"/> | <input type="checkbox"/>            | <input checked="" type="checkbox"/> | <input type="checkbox"/>            | <input checked="" type="checkbox"/> | <input type="checkbox"/> | <input checked="" type="checkbox"/> | <input checked="" type="checkbox"/> | <input checked="" type="checkbox"/> | <input checked="" type="checkbox"/> |

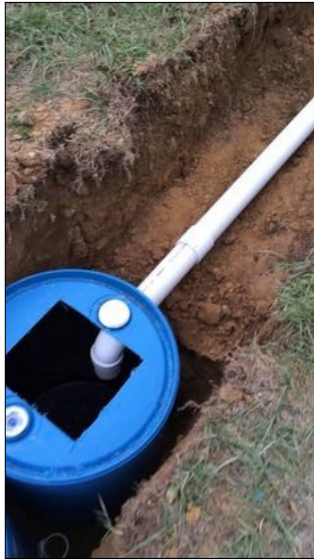

(a)

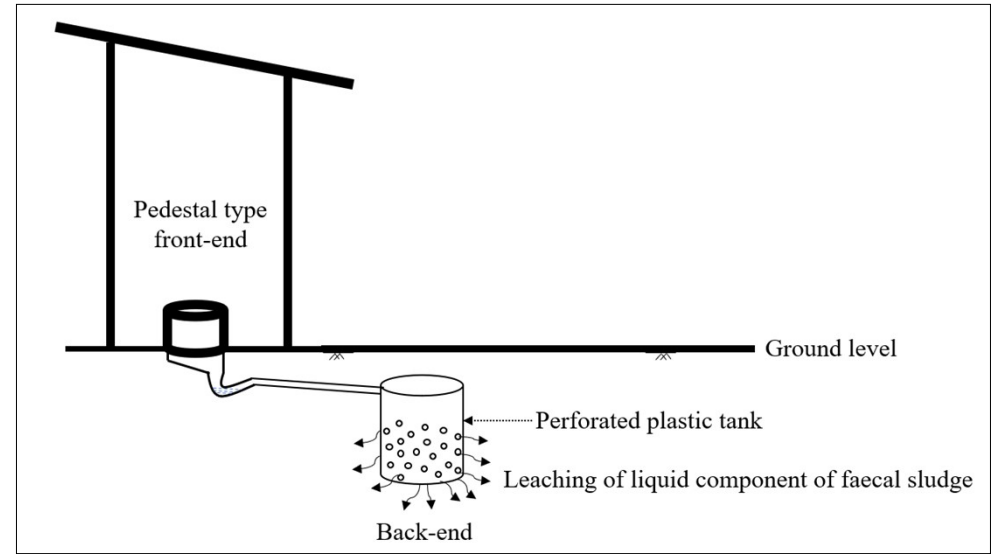

(b)

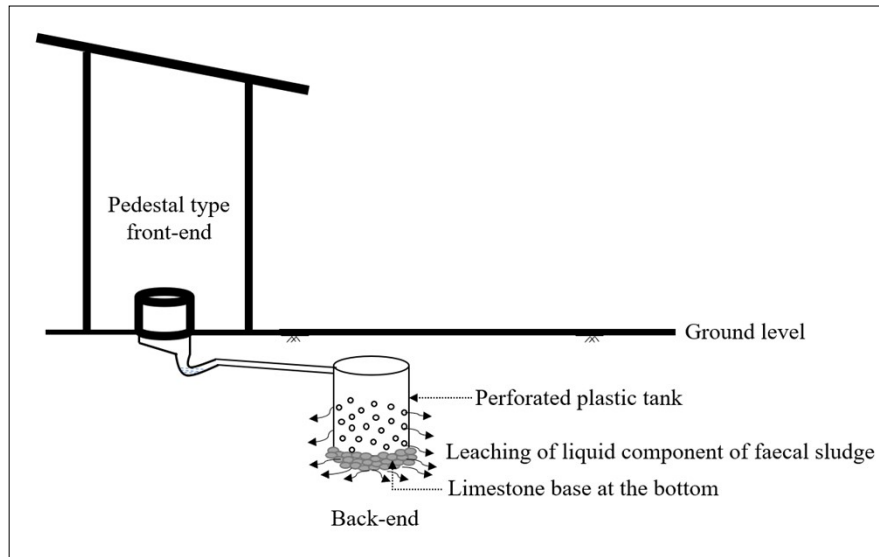

(c)

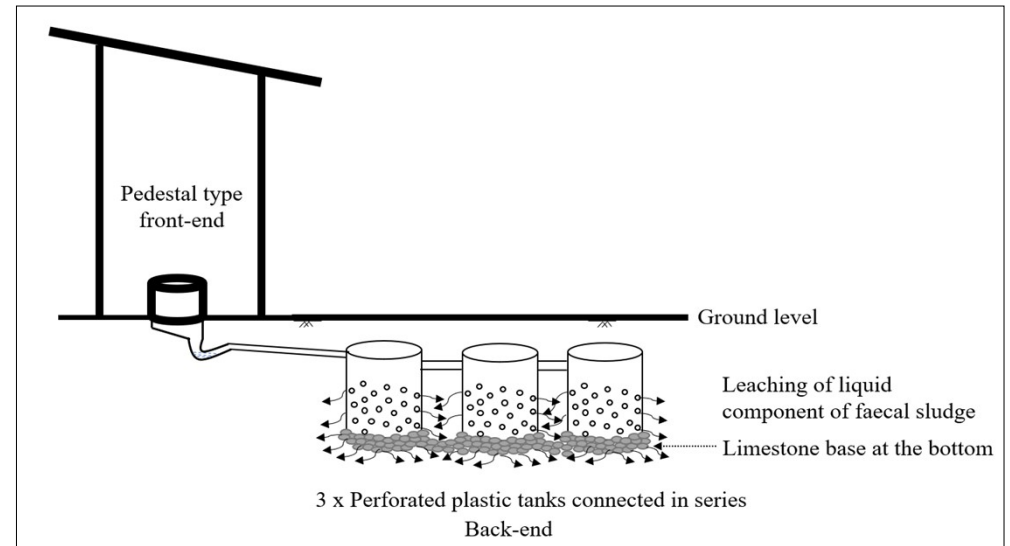

(d)

**Figure S1:** Common types of tank type back-ends in rural communities of Fiji. (a) Construction photograph from Upper Navua catchment where tank type back-end was being placed. (b) Perforated tank type back-ends to allow the liquid component of faecal sludge to leach through the soil layers. (c) Limestones base used to slower the process of the liquid leaching. (d) multiple tanks connected in series to cater for larger household sizes.

## **Reference**

1. WHO, Sanitation safety planning: manual for safe use and disposal of wastewater, greywater and excreta, 2016.
2. UNICEF and WHO, Core questions on drinking water, sanitation and hygiene for household surveys: 2018 update, 2018.
